# Supplementary material for: Intramolecular cyclization of a diruthenium complex: insight into the mechanism of heteroatom-directed intramolecular C–H/olefin coupling reactions
Source: Royal Society of Chemistry journal article supplement (doi:10.1039/c5dt02071a), 2015-01-01
Supplement: c5dt02071a1.pdf [file c5dt02071a1.pdf]

*Electronic Supplementary Information for:*

**Intramolecular cyclization of a diruthenium complex: insight into the  
mechanism of heteroatom-directed intramolecular C-H/olefin  
coupling reactions**

Dawei Gong,<sup>ac</sup> Bowen Hu,<sup>a</sup> Jing Shi<sup>a</sup> and Dafa Chen<sup>\*ab</sup>

Table of Contents

|                            |    |
|----------------------------|----|
| Experimental Section       | S2 |
| IR Spectra                 | S4 |
| <sup>1</sup> H NMR spectra | S5 |

## Experimental Section

### A. Chemicals and Reagents

All manipulations were carried out under an inert N<sub>2</sub>(g) atmosphere using a Schlenk line. Solvents were distilled from appropriate drying agents under N<sub>2</sub> before use. All reagents were purchased from commercial sources. Liquid compounds were degassed by standard freeze-pump-thaw procedures prior to use.  $\{(C_5H_4N)(\mu_2-\eta^5:\eta^1-C_9H_5)\}Ru_3(CO)_9$  (**1**) was prepared as described previously.<sup>S1</sup>

### B. Physical methods

The <sup>1</sup>H NMR spectra were recorded on a Bruker Avance 400 spectrometer. <sup>1</sup>H NMR chemical shifts were referenced to residual solvent as determined relative to Me<sub>4</sub>Si ( $\delta = 0$  ppm). IR spectra were recorded on a Nicolet iS5 FT-IR spectrometer. Elemental analyses were performed on a Perkin-Elmer 240C analyzer. X-ray diffraction studies were carried out in a Xcalibur E X-ray single crystal diffractometer. Data collections were performed using four-circle kappa diffractometers equipped with CCD detectors. Data were reduced and then corrected for absorption.<sup>S2</sup> Solution, refinement and geometrical calculations for all crystal structures were performed by SHELXTL.<sup>S3</sup>

### C. Synthetic methods

Synthesis of  $\{(C_5H_4N)(\mu_3-\eta^5,\eta^2,\eta^1-C_9H_5CHCH_2CH_2CH_2CH=CH_2)\}Ru_2(CO)_4$  (**2**)

A solution of 0.200 g (0.27 mmol) of **1** and 0.219 g (2.7 mmol) of 1, 5-hexadiene in 10 mL toluene was refluxed for 4 h. The solvent was removed under reduced pressure, and the residue was placed in an Al<sub>2</sub>O<sub>3</sub> column. Elution with EtOAc/petroleum ether (v : v = 20 : 1) to give 0.095 g (60.4%) of **2** as orange crystals. Mp: 180 °C (dec). Anal. Calcd for C<sub>24</sub>H<sub>19</sub>NO<sub>4</sub>Ru<sub>2</sub>: C, 49.1; H, 3.3; N, 2.4. Found: C, 49.3; H, 3.2; N, 2.2. <sup>1</sup>H NMR (400 Hz, CDCl<sub>3</sub>):  $\delta$  [7.68 (d,  $J = 8.0$  Hz, 1H), 7.58 (td,  $J_1 = 8.0$  Hz,  $J_2 = 1.6$  Hz, 1H), 7.42 (m, 2H), 7.29 (m, 1H), 7.19 (m, 2H), 6.87 (m, 1H)] (Py-H and Ar-H), 4.85 (s, 1H, Cp-H), [3.59 (d,  $J = 13.0$  Hz, 1H), 3.48 (d,  $J = 8.4$  Hz, 1H), 3.15 (m, 1H), 2.87 (m, 1H), 2.32 (m, 2H), 2.15-1.97 (m, 2H), 1.34-1.14 (m, 2H)] (CHCH<sub>2</sub>CH<sub>2</sub>CH<sub>2</sub>CH=CH<sub>2</sub>). IR( $\nu_{CO}$ , cm<sup>-1</sup>, CH<sub>2</sub>Cl<sub>2</sub>): 2023 (s), 1955 (s), 1900 (s).

Synthesis of  $\{(C_5H_4N)(\mu_2-\eta^3,\eta^5-C_9H_5CCH_2CH_2CH_2CCH_2)\}Ru_2(CO)_4$  (**3**)

A solution of 0.500 g (0.85 mmol) of **2** in 10 mL toluene was refluxed for 12 h. The solvent was removed under reduced pressure, and the residue was placed in an Al<sub>2</sub>O<sub>3</sub> column. Elution with EtOAc/petroleum ether (v : v = 20 : 1) to give 0.380 g (76.3 %) of **3** as orange crystals. Mp: 180°C (dec). Anal. Calcd for C<sub>24</sub>H<sub>17</sub>NO<sub>4</sub>Ru<sub>2</sub>: C, 49.2; H, 2.9; N, 2.4. Found: C, 49.5; H, 3.2; N, 2.3. <sup>1</sup>H NMR (400 Hz, CDCl<sub>3</sub>):  $\delta$  [8.48 (d,  $J = 5.2$  Hz, 1H), 7.72 (t,  $J = 8.4$  Hz, 1H), 7.56 (d,  $J = 8.0$  Hz, 1H), 7.48 (d,  $J = 8.0$  Hz, 1H), 7.33 (d,  $J = 8.4$  Hz, 1H), 7.24 (m, 1H), 7.12 (t,  $J = 8.0$  Hz, 1H), 7.01 (t,  $J = 8.4$  Hz, 1H)] (Py-H and Ar-H), 4.35 (s, 1H, Cp-H), [3.16 (m, 1H), 2.64 (m, 1H),

2.47 (m, 1H), 2.31 (m, 2H), 1.96 (m, 2H), 1.50 (m, 1H)] (CCH<sub>2</sub>CH<sub>2</sub>CH<sub>2</sub>C=CH<sub>2</sub>). IR( $\nu_{\text{CO}}$ , cm<sup>-1</sup>, CH<sub>2</sub>Cl<sub>2</sub>): 2002 (s), 1958 (s), 1928 (m), 1904 (s).

Catalytic reaction of 3-(2-pyridyl)indene with 1,5-hexadiene

A solution of 0.173 g (1 mmol) of 3-(2-pyridyl)indene, 0.164 g (2 mmol) of 1,5-hexadiene, and 0.064 g (0.1 mmol) of Ru<sub>3</sub>(CO)<sub>12</sub> in 10 mL toluene was refluxed for 12 h. The solvent and 1,5-hexadiene were removed under reduced pressure, and the residue was placed in an Al<sub>2</sub>O<sub>3</sub> column. Elution with EtOAc/petroleum ether ( $v : v = 10 : 1$ ) to give 0.090 g (48.9 %) of [(C<sub>5</sub>H<sub>4</sub>N)(C<sub>9</sub>H<sub>6</sub>)]Ru(CO)<sub>2</sub> and 0.057 g (recovery yield : 33.0%) of 3-(2-pyridyl)indene.

Catalytic reaction of 2-phenylpyridine with 1,5-hexadiene

A solution of 0.155 g (1 mmol) of 2-phenylpyridine, 0.164 g (2 mmol) of 1,5-hexadiene, and 0.064 g (0.1 mmol) of Ru<sub>3</sub>(CO)<sub>12</sub> in 10 mL toluene was refluxed for 12 h. The solvent and 1,5-hexadiene were removed under reduced pressure, and the residue was placed in an Al<sub>2</sub>O<sub>3</sub> column. Elution with EtOAc/petroleum ether ( $v : v = 10 : 1$ ) to give 0.090 g (51.5 %) of [(C<sub>5</sub>H<sub>4</sub>N)(C<sub>6</sub>H<sub>4</sub>)]Ru(CO)<sub>2</sub> and 0.039 g (recovery yield : 25.3%) of 2-phenylpyridine.

#### D. Crystallographic Details for 2

A total of 8580 reflections ( $-20 \leq h \leq 20$ ,  $-17 \leq k \leq 17$ ,  $-20 \leq l \leq 20$ ) were collected at  $T = 293(2)$  K in the range of 2.99 to 25° of which 3759 were unique ( $R_{\text{int}} = 0.0234$ ); MoK $\alpha$  radiation ( $\lambda = 0.71073$  Å). The structure was solved by the direct methods. All non-hydrogen atoms were refined anisotropically, and hydrogen atoms were placed in calculated idealized positions. The residual peak and hole electron densities were 0.362 and -0.331 eÅ<sup>-3</sup>, respectively. The least squares refinement converged normally with residuals of  $R(F) = 0.0244$ ,  $wR(F^2) = 0.0485$  and a GOF = 1.048 ( $I > 2\sigma(I)$ ). C<sub>24</sub>H<sub>19</sub>NO<sub>4</sub>Ru<sub>2</sub>, Mw = 587.54, space group C2/c, Monoclinic,  $a = 17.6013(5)$ ,  $b = 15.0254(4)$ ,  $c = 17.6493(6)$  Å,  $\beta = 113.718(4)^\circ$ ,  $V = 4273.4(2)$  Å<sup>3</sup>,  $Z = 8$ ,  $\rho_{\text{calcd}} = 1.826$  Mg/m<sup>3</sup>.

#### E. Crystallographic Details for 3

A total of 14062 reflections ( $-19 \leq h \leq 13$ ,  $-11 \leq k \leq 9$ ,  $-37 \leq l \leq 37$ ) were collected at  $T = 296(2)$  K in the range of 2.24 to 25° of which 4026 were unique ( $R_{\text{int}} = 0.0312$ ); MoK $\alpha$  radiation ( $\lambda = 0.71073$  Å). The structure was solved by the direct methods. All non-hydrogen atoms were refined anisotropically, and hydrogen atoms were placed in calculated idealized positions. The residual peak and hole electron densities were 0.623 and -0.695 eÅ<sup>-3</sup>, respectively. The least squares refinement converged normally with residuals of  $R(F) = 0.0471$ ,  $wR(F^2) = 0.1131$  and a GOF = 1.098 ( $I > 2\sigma(I)$ ). C<sub>24</sub>H<sub>17</sub>NO<sub>4</sub>Ru<sub>2</sub>, Mw = 585.53, space group P 21/c, Monoclinic,  $a = 16.155(5)$ ,  $b = 9.626(3)$ ,  $c = 31.755(7)$  Å,  $\beta = 120.579(11)^\circ$ ,  $V = 4251(2)$  Å<sup>3</sup>,  $Z = 8$ ,  $\rho_{\text{calcd}} = 1.830$  Mg/m<sup>3</sup>.

## References

(S1)Chen, D.; Zhang, X.; Xu, S.; Song, H.; Wang, B. *Organometallics* **2010**, *29*, 3418.

(S2)Blessing, R. H. *Acta Crystallogr. A* **1995**, *51*, 33-38.

(S3)Sheldrick, G. M. *SHELXTL* release 6.1.4 ed.; Bruker AXS Inc.: Madison, Wisconsin, 53719, USA, 2003.

## IR Spectra

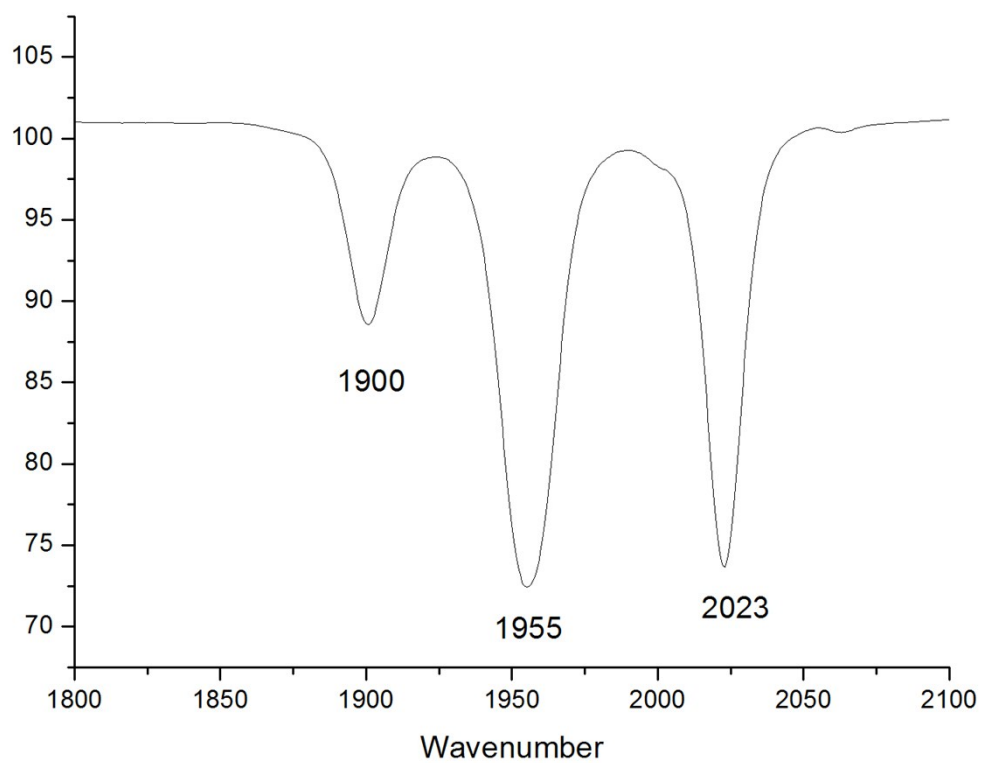

Figure S1. IR spectrum of **2** in  $\text{CH}_2\text{Cl}_2$ .

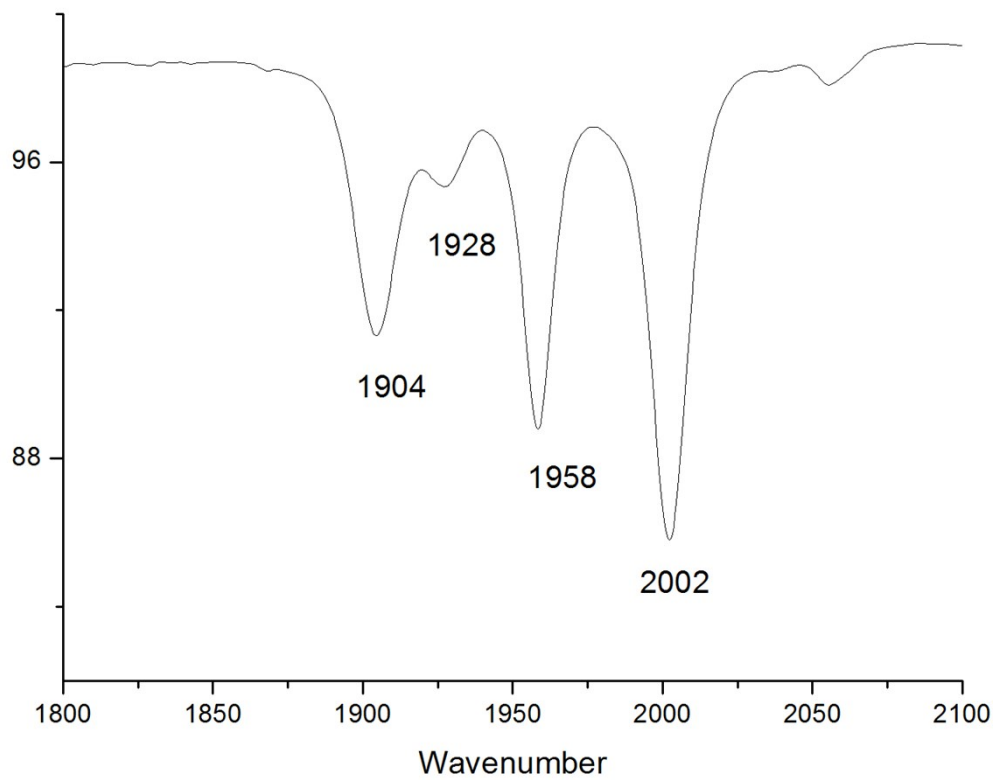

Figure S2. IR spectrum of **3** in  $\text{CH}_2\text{Cl}_2$ .

# 1H NMR Spectra

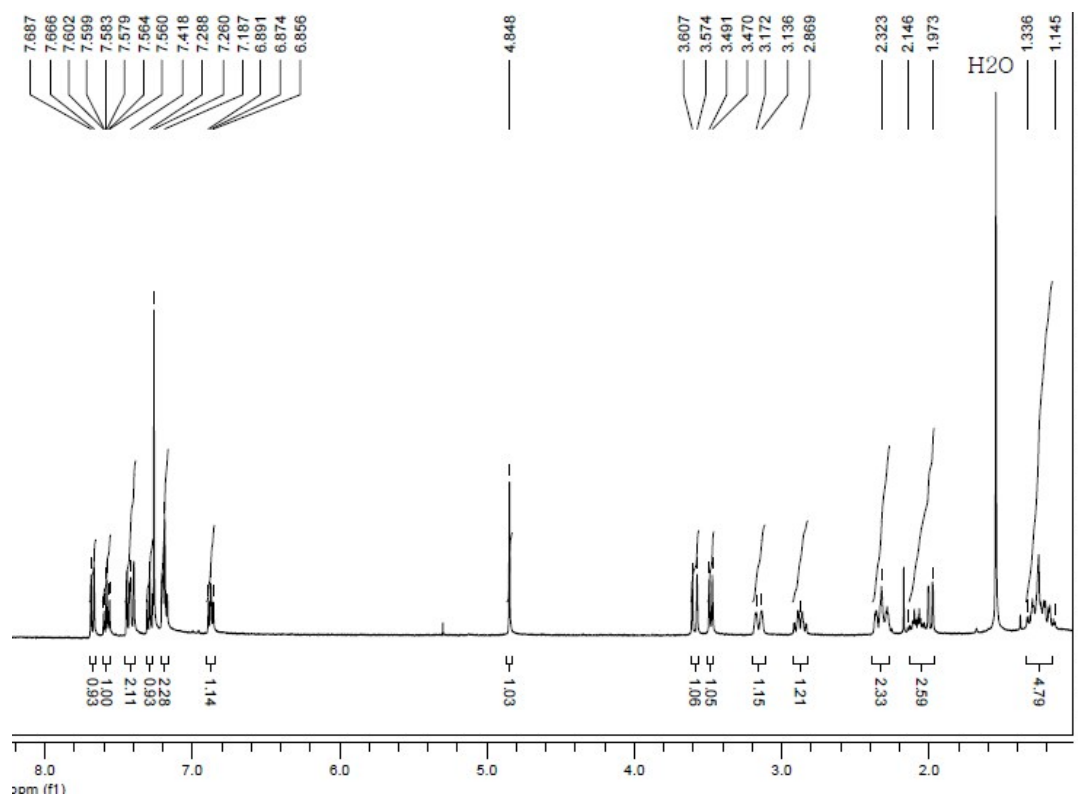

Figure S3. <sup>1</sup>H NMR spectrum of **2** in CH<sub>2</sub>Cl<sub>2</sub>.

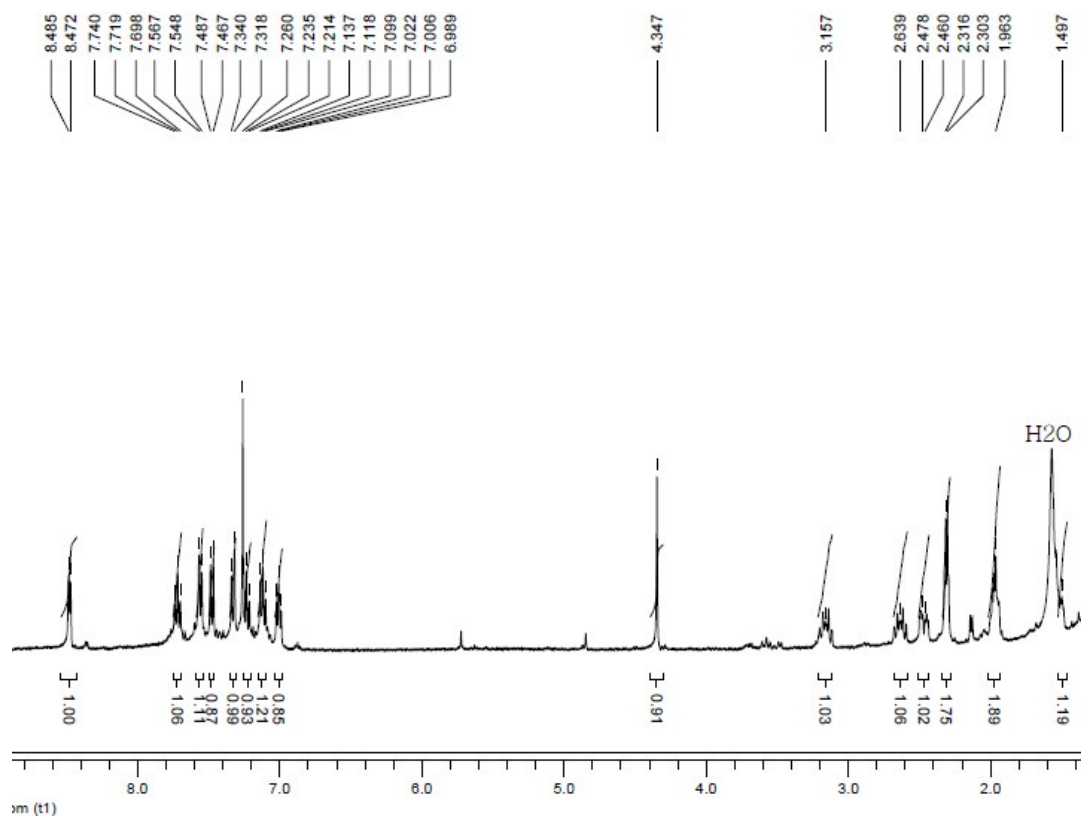

Figure S4. <sup>1</sup>H NMR spectrum of **3** in CH<sub>2</sub>Cl<sub>2</sub>.
